# Supplementary material for: Anodized pore structural evolution of focused ion beam patterned Al: direct analysis of branched nanopores and nanosacks
Source: Royal Society of Chemistry journal article supplement (doi:10.1039/c3cp50630d), 2013-01-01
Supplement: c3cp50630d.pdf [file c3cp50630d.pdf]

Cite this: DOI: 10.1039/c0xx00000x

www.rsc.org/xxxxxx

ARTICLE TYPE

### Supporting Information

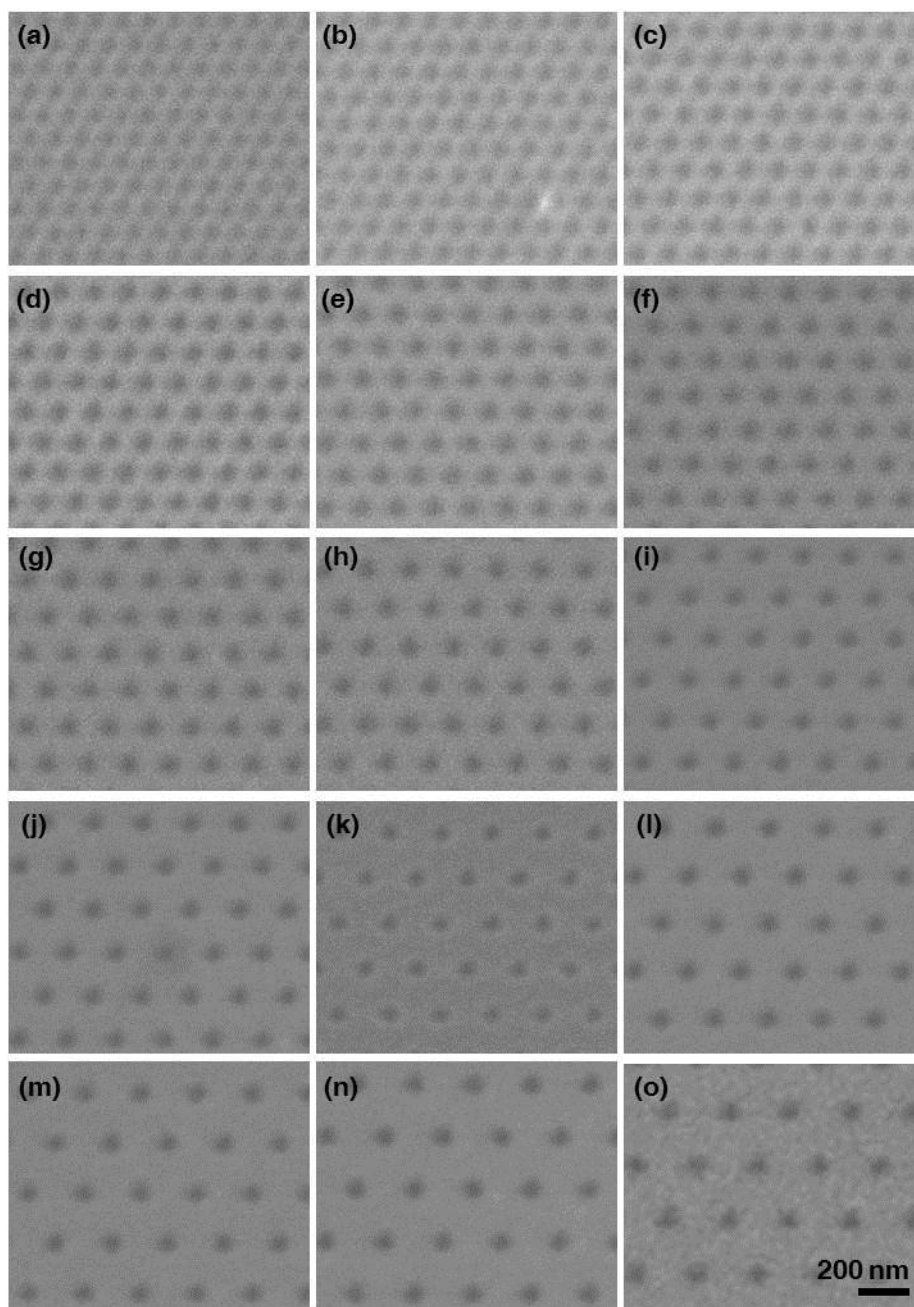

Figure S1. SEM images of the FIB-patterned aluminium foil surface. The FIB patterns are set with different inter-pore distances: (a) 100 nm, (b) 110 nm, (c) 120 nm, (d) 130 nm, (e) 140 nm, (f) 150 nm, (g) 160 nm, (h) 170 nm, (i) 180 nm, (j) 190 nm, (k) 200 nm, (l) 210 nm, (m) 220 nm, (n) 230 nm, and (o) 240 nm.

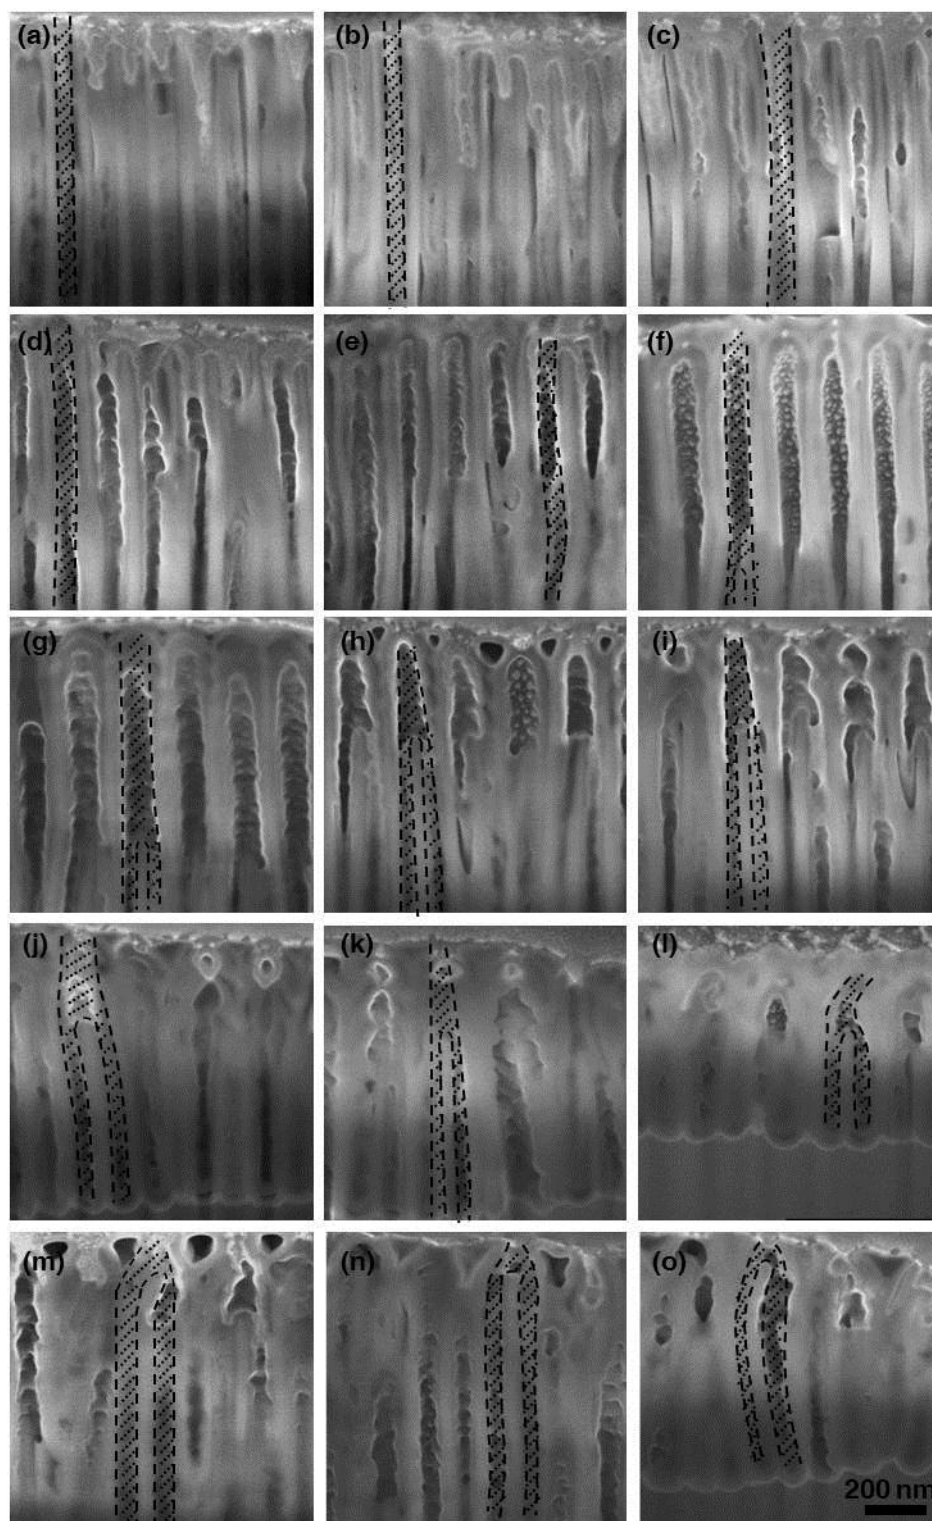

**Figure S2.** SEM cross-section images of anodized nanopore patterns in 0.3M oxalic acid with a steady state potential of 40 V for 3 hr. The FIB patterns are set with different inter-pore distances: (a) 100 nm, (b) 110 nm, (c) 120 nm, (d) 130 nm, (e) 140 nm, (f) 150 nm, (g) 160 nm, (h) 170 nm, (i) 180 nm, (j) 190 nm, (k) 200 nm, (l) 210 nm, (m) 220 nm, (n) 230 nm and (o) 240 nm.

Cite this: DOI: 10.1039/c0xx00000x

www.rsc.org/xxxxxx

ARTICLE TYPE

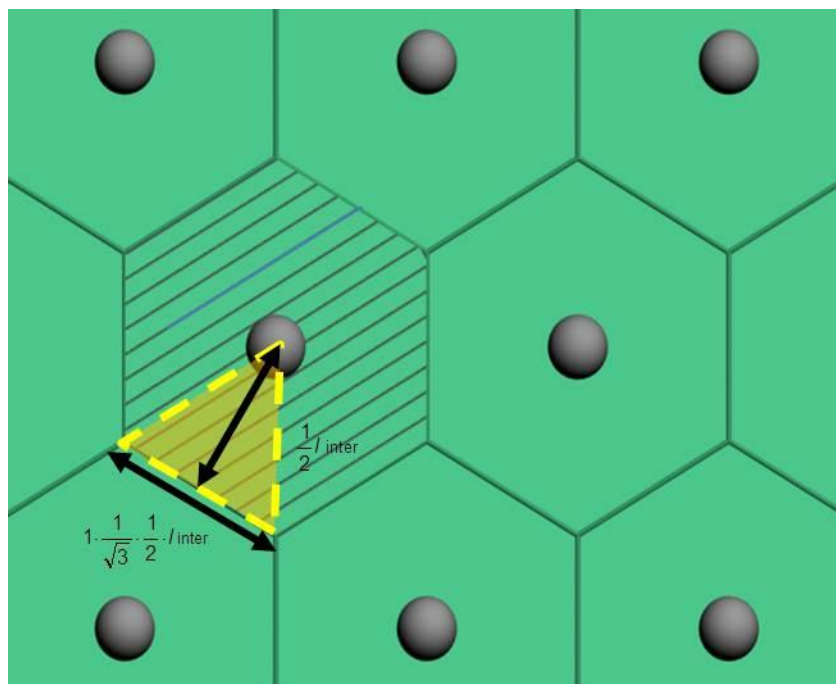

$$Area A_{inter} = \left( \frac{1}{\sqrt{3}} \cdot l_{inter} \right) \cdot \left( \frac{1}{2} \cdot l_{inter} \right) \cdot 6$$

**Figure S3.** Graphical description of theoretical maximum area occupied with a nanopore.

Ideal inter pore distance under the condition of anodic oxidation in 0.3M oxalic acid at 10 °C under 40 V is 100 nm. When the inter pore distances are tuned in a range of 110 to 240 nm, the maximum area which can be occupied with the nanopore is adjusted in accordance with inter pore distances with assumption that each nanopore maintains their straightness. The maximum area with 100 nm inter pore distance,  $A_{100}$ , compared to area  $A_{int}$  in a range of 110 to 240 nm inter pore distances. From 110 to 140 nm, the ratios of  $A_{int}$  to  $A_{100}$  are less than double and thus the nanopores can be tilted without new nanochannel formation. Two or three nanopores can lead off the prepatterned nanopore with inter pore distances in a range of 150 nm to 190 nm in terms of area calculation. At distances over 200 nm, newly formed four nanopores can be arranged in a shape of an inverted tetrahedron. The three dimensional sub nanopores array can explain the round flask-shaped barrier layer formation.

Cite this: DOI: 10.1039/c0xx00000x

www.rsc.org/xxxxxx

ARTICLE TYPE

Table S1. Theoretical maximum area occupied with a nanopore with a certain interpore distance.

| X                       |                         |                                               |
|-------------------------|-------------------------|-----------------------------------------------|
| Interpore distance (nm) | Area (nm <sup>2</sup> ) | Ratio of A <sub>int</sub> to A <sub>100</sub> |
| 100                     | 8660.25                 | 1.00                                          |
| 110                     | 10478.91                | 1.21                                          |
| 120                     | 12470.77                | 1.44                                          |
| 130                     | 14635.83                | 1.69                                          |
| 140                     | 16974.1                 | 1.96                                          |
| 150                     | 19485.57                | 2.25                                          |
| 160                     | 22170.25                | 2.56                                          |
| 170                     | 25028.13                | 2.89                                          |
| 180                     | 28059.22                | 3.24                                          |
| 190                     | 31263.52                | 3.61                                          |
| 200                     | 34641.02                | 4.00                                          |
| 210                     | 38191.72                | 4.41                                          |
| 220                     | 41915.63                | 4.84                                          |
| 230                     | 45812.74                | 5.29                                          |
| 240                     | 49883.06                | 5.76                                          |
